# Supplementary material for: Direct fabrication of nanoporous graphene from graphene oxide by adding a gasification agent to a magnesiothermic reaction
Source: Royal Society of Chemistry journal article supplement (doi:10.1039/c4cc08977d), 2014-12-15
Supplement: c4cc08977d1.pdf [file c4cc08977d1.pdf]

# Direct Fabrication of Nanoporous Graphene from Graphene Oxide by Adding a Gasification Agent to a Magnesiothermic Reaction

Zhenyu Xing,<sup>a</sup> Bao Wang,<sup>a</sup> Joshua Kane Halsted,<sup>a</sup> Raghu Subashchandrabose,<sup>a</sup> William F. Stickle<sup>b</sup> and Xiulei Ji<sup>a\*</sup>

<sup>a</sup>Department of Chemistry, Oregon State University, Corvallis, Oregon 97331, United States

<sup>b</sup>Hewlett-Packard Co., 1000 NE Circle Blvd., Corvallis, Oregon 97330, United States

## Experiment Section

In order to form CaCO<sub>3</sub>/GO composite, we first mixed 600 mg CaO and 200 ml DI water by sonication for 8 h under CO<sub>2</sub> gas flow at a flow rate of 60 CCM. Then we added 100 ml GO aqueous suspension containing GO 60mg, prepared from modified Hummers method, into the Ca(HCO<sub>3</sub>)<sub>2</sub> solution, and continued sonication for another 16 h under CO<sub>2</sub> gas flow. The mixture was dried in an oven at 50 °C for 48 h in order to convert Ca(HCO<sub>3</sub>)<sub>2</sub> into CaCO<sub>3</sub>. Then, we mixed the CaCO<sub>3</sub>/GO composite with magnesium powder in mass ratio of 1 to 2 and conducted a reaction in the tube furnace at 650°C for 2.5 h under argon gas. Finally, the graphene product is collected after being washed with an aqueous solution of 1 M HCl, and oven dried at 60°C overnight.

## Characterization methods:

The X-ray diffraction (XRD) patterns were collected using a Rigaku Ultima IV Diffractometer with Cu K $\alpha$  irradiation ( $\lambda$ = 1.5406 Å). The morphology was examined by a field emission scanning electron microscopy (FESEM) using an FEI NOVA 230 high resolution SEM with an energy-dispersive X-ray (EDX) attachment. Transmission electron microscopy (TEM) images were recorded by a FEI Titan 80-200 TEM. High-angle annular dark field scanning TEM (HAADF-STEM) measurements were carried out on an FEI Titan 80-200 microscope coupled with a HAADF detector and an EDX spectrometer. Nitrogen sorption measurements were performed on Micromeritics TriStar II 3020 analyzer. X-ray Photoelectron Spectroscopy (XPS) measurements were performed in a Physical Electronics Quantera Scanning ESCA Microprobe with a focused monochromatic Al K $\alpha$  X-ray (1486.6 eV) source for excitation. The X-ray beam used was a 25 W, 100  $\mu$ m X-ray beam spot at the sample. The binding energy (BE) scale was calibrated using the Cu 2p<sub>3/2</sub> feature at 932.62  $\pm$  0.05 eV and Au 4f at 83.96  $\pm$  0.05 eV. The ion gun used in this system was a standard Quantera ion gun, and the sputter depth profiles were acquired using a 1 KeV argon-ion beam

rastered over a 3 mm x 3 mm area. To minimize charging artifacts, the XPS data were collected with 1 eV, 20  $\mu$ A electrons and low-energy  $\text{Ar}^+$  ions.

### List of Supporting Figures

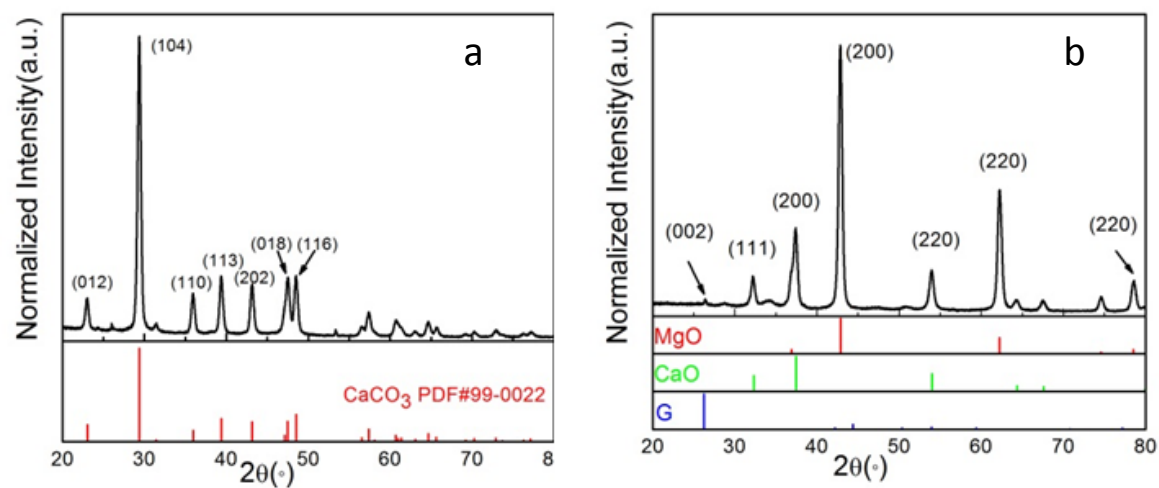

**Fig. S1** XRD patterns of  $\text{CaCO}_3/\text{GO}$  **a** before and **b** after the magnesiothermic reaction.

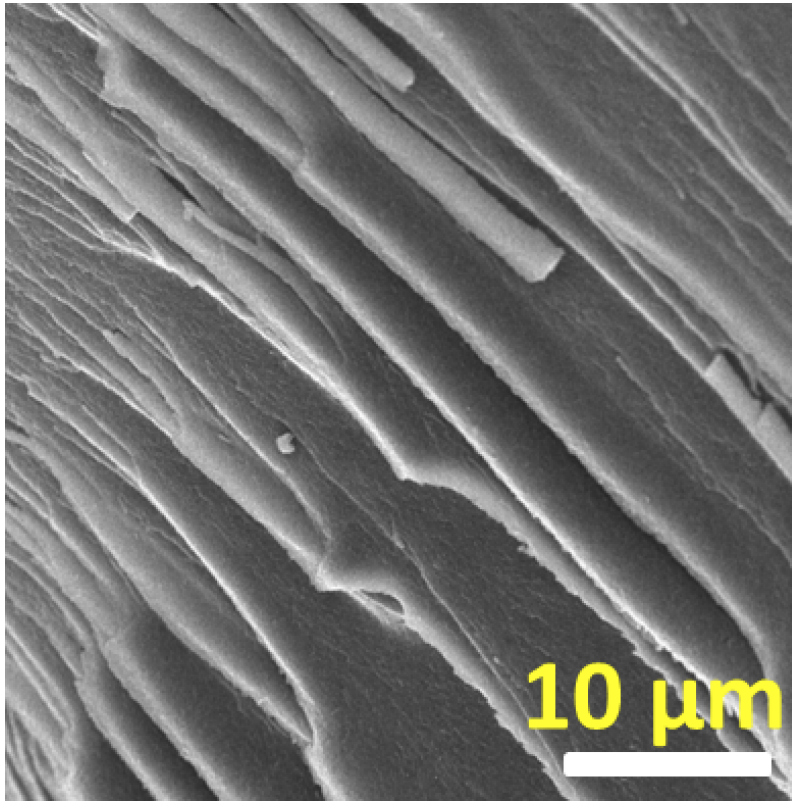

**Fig. S2** SEM image of GC.

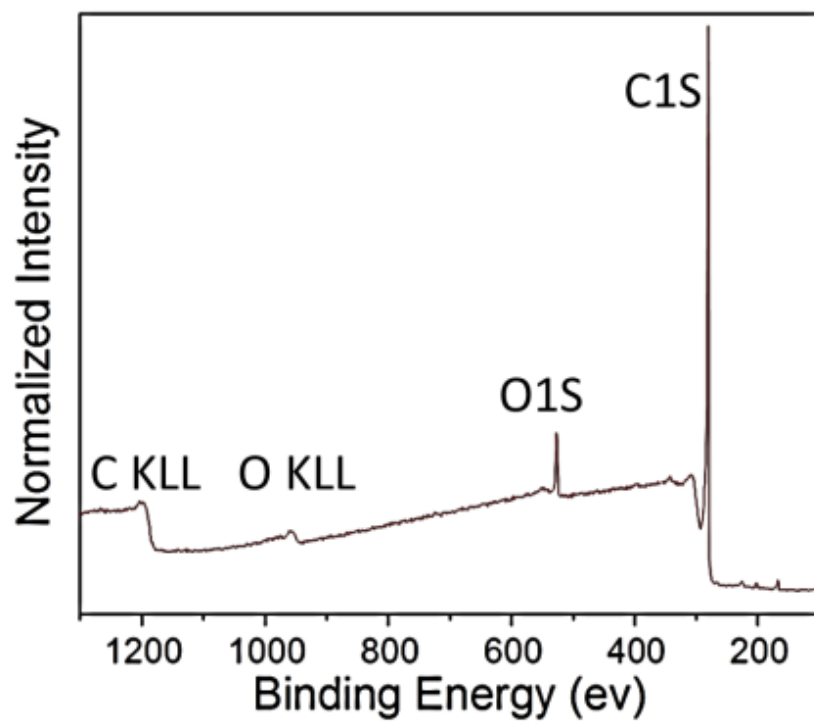

**Fig. S3** XPS survey of GC-E.
